# Supplementary material
Source: MDPI journal article supplement (https://www.mdpi.com/2076-3417/9/3/386)
Supplement: s1 [file s1]

# Diverse Decoding for Abstractive Document Summarization

Xu-Wang Han, Hai-Tao Zheng \*, Jin-Yuan Chen and Cong-Zhi Zhao

Fifteen tables contenting the decoding results described in the manuscript.

For each of the table, the first-row contents the summary written by human. On the second-row, left cell is the decoding results of our proposed DPBS method, and the right cell contains results produced by standard beam search.

Articles are randomly picked from the CNN/Daily Mail test dataset. Due to original documents are too long, and the purpose of this material is to demonstrate the diverse decoding method, we omitted the article content here.

1. Muhammadu buhari's win marks the first democratic transition of power from a ruling party to the opposition. Nigeria, the most populous country in africa, is grappling with violent boko haram extremists.

The last time in nigeria's history, the opposition defeated the ruling party in democratic elections. Muhammadu buhari, 72, won nigeria's presidential election, defeating incumbent goodluck jonathan by about two million votes.

Frida ghitis: the last time muhammadu buhari came to power in nigeria. She says nigeria's security needs to be the next government's focus. She says nigeria must be the next government's focus on corruption.

David frum: nigeria's history of military rule is the biggest economy and most populous country. He says nigeria's security needs to be the next government's focus. He says the elections are largely predicted to be mostly unfounded.

Peter bergen: nigeria's history of military rule is the biggest economy. He says nigeria must be the next government's focus. He says the elections are largely predicted to be violent and everyone.

Five reasons why one of the most fiercely-contested elections in the country's history is so important. For the first time in nearly 30 years, the opposition defeated the ruling party in democratic elections.

Five reasons why one of the most fiercely-contested elections in the country's history is so important. For the first time in nigeria's history, the opposition defeated the ruling party in democratic elections.

Five reasons why one of the most fiercely-contested elections in the country's history is so important. Muhammadu buhari, 72, won nigeria's presidential election, defeating incumbent goodluck jonathan by about two million votes.

Five reasons why one of the most fiercely-contested elections in the country's history is so important. For the first time in nearly 30 years, the opposition defeated incumbent goodluck jonathan by about two million votes.

2. Pepperdine university seeks ways to meet new usage allowances, turns off fountains. Drought-stricken california for the first time imposes water restrictions. Executive order demands that cities and towns reduce water usage by 25%.

“we're in a new era,” brown says. The 25% cut in usage amounts to roughly 1.5 million acre-feet of water. The reduction in water use does not apply to the agriculture industry.

Agriculture uses about 80% of california’s developed water supply. The reduction in water use does not apply to the agriculture industry. The exclusion prompted some criticism, as agriculture uses.

Jerry brown says drought demands unprecedented action. the 25% cut in usage amounts to roughly 1.5 million acre-feet of water. The reduction in water use does not apply to the agriculture industry.

Gov. jerry brown says the drought has yet to hurt revenue. The sierra nevada snowpack is near a record low. The action comes as the sierra nevada snowpack, which californians rely on heavily.ely predicted to be violent and everyone.

The golden state could soon refer to the hue of california’s lawns. The reduction in water use does not apply to the agriculture industry. The action comes as the sierra nevada snowpack, which californians rely on heavily during the summer for their water needs.

The golden state could soon refer to the hue of california’s lawns. The reduction in water use does not apply to the agriculture industry. The action comes as the sierra nevada snowpack, which californians rely on heavily during the summer.

The golden state could soon refer to the hue of california’s lawns. The reduction in water use does not apply to the agriculture industry, except for the requirement that it report more information on its groundwater use.

The golden state could soon refer to the hue of california’s lawns. The 25% cut in usage amounts to roughly 1.5 million acre-feet of water -lrb- an acre foot of water equals about 325,000 gallons.

3. William barber: mcdonald's will raise minimum wage \$ 1 for 10% of workers. This is a step in right direction but falls short in three ways. He says it leaves out 90% of workers, is not enough to lift workers from poverty, company prevents workers from speaking out in a union.

The company is going to raise wages for 90,000 of its employees. The announcement only affects 10% of the mcdonald's restaurants in the united states. The raise isn't nearly enough, as people of my faith say, for those cooks and cashiers to afford their daily bread.

Isaiah 58.6: the company is going to raise wages for 90,000 of its employees. The announcement only affects 10% of the mcdonald's restaurants in the united states. The raise isn't nearly enough, as people of my faith say.

Isaiah 58.6: the company is going to raise wages for 90,000 of its employees. The announcement only affects 10% of the mcdonald's restaurants in the united states. The raise isn't nearly enough, as people of my faith say, for those cooks and cashiers to afford their daily bread.

Fast-food workers are making it less acceptable for profitable companies like mcdonald's to pay wages. But this action is the kind of fast day I'm after: [UNK]. The company is going to raise wages for 90,000 of its employees.

Isaiah 58.6 says the company is going to raise wages for 90,000 of its employees. The announcement only affects 10% of the mcdonald's restaurants in the united states, ignoring the employees who work at franchised mcdonald's restaurants.

Isaiah 58.6 says the company is going to raise wages for 90,000 of its employees. The announcement only affects 10% of the mcdonald's restaurants in the united states. That means hundreds of thousands of workers serving big macs and fries won't see a dollar more in their paychecks.

Isaiah 58.6 says the company is going to raise wages for 90,000 of its employees. The announcement only affects 10% of the mcdonald's restaurants in the united states, ignoring the national labor relations board.

Isaiah 58.6 says the company is going to raise wages for 90,000 of its employees. The announcement only affects 10% of the mcdonald's—owned restaurants to at least \$ 1 an hour more than the minimum wage set by local law.

4. Facebook group wants lucille ball statue replaced with a new one. mayor says he does not want to spend taxpayer money on fixing statue.

Fans of lucille ball want her statue removed from a park in her hometown. Mayor scott schrecengost has gone on record saying he does not care for the statue. The founder of the facebook group would like to see the statue replaced with a new one outside a planned comedy hall of fame in jamestown.

The life-size bronze statue in celoron, new york, has been likened to conway twitty. The comedian's birthplace, attracting visitors who pose with the statue for pictures. The founder of the facebook group would like to see the statue replaced with a new one outside a planned comedy hall of fame in jamestown.

Lucille ball has been likened to conway twitty. The life-size bronze statue in celoron, new york, has been a tourist draw since 2009. The founder of the facebook group would like to see the statue replaced with a new one outside a planned comedy hall of fame in jamestown.

Mayor scott schrecengost has been likened to conway twitty. The life-size bronze statue in celoron, new york, has been a tourist draw since 2009. The founder of the facebook group would like to see the statue replaced with a new one outside a planned comedy hall of fame in jamestown.

The life-size bronze statue in celoron, new york, has been likened to conway twitty. Mayor scott schrecengost has gone on record saying he does not care for the "ugly" statue.

The life-size bronze statue in celoron, new york, has been likened to conway twitty. Mayor scott schrecengost has gone on record saying he does not care for the "ugly" likeness.

The life-size bronze statue in celoron, new york, has been likened to conway twitty. Mayor scott schrecengost has gone on record saying he does not care for the statue. A story about the group on yahoo! News this week spread through the internet.

The life-size bronze statue in celoron, new york, has been likened to conway twitty. Mayor scott schrecengost has gone on record saying he does not care for the statue. The comedian's birthplace, attracting visitors who pose with the statue for pictures.

5. The revised indictment is released monday. Dilkhayot kasimov is charged with two counts of providing support to a foreign terrorist organization. Three other men have also been charged in the plot and pleaded not guilty.

A fourth man has been indicted in connection with a plot to provide material support to terrorists. He and habibov habibov were charged with two counts of providing support to a foreign terrorist organization. Saidakhmetov kasimov was arrested in jacksonville, florida.

Court documents say said akhmetov and saidakhmetov planned to join isis. Indictment and criminal complaint filed last month say juraboev and abror habibov. Saidakhmetov has been indicted in connection with a plot to provide material support to terrorists.

An indictment of a fourth man has been indicted in connection with a plot to provide material support to terrorists. The names of isis from the west have been recruited to a foreign terrorist organization. Saidakhmetov kasimov was arrested in jacksonville, florida.

Indictment alleges fourth man indicted in connection with plot to provide material support to terrorists. Indictment alleges juraboev and saidakhmetov habibov were charged with two counts of providing support to a organization. indictment alleges juraboev operates mall kiosks that sell kitchenware and repair mobile phones.

Indictment: dilkhayot kasimov was added to a superseding indictment in which three previously arrested men. Abdurasul hasanovich juraboev, akhror saidakhmetov, and abror habibov were charged with two counts of providing support to a foreign terrorist organization.

Indictment: dilkhayot kasimov was added to a superseding indictment in which three previously arrested men. Abdurasul hasanovich juraboev, akhror saidakhmetov, and abror habibov were charged with two counts of providing support to a foreign terrorist organization. Those three have pleaded not guilty.

Indictment: dilkhayot kasimov was added to a superseding indictment in which three previously arrested men. Abdurasul hasanovich juraboev, akhror saidakhmetov, and abror habibov were charged with two counts of providing support to a foreign terrorist organization. It is unclear if kasimov has been arrested.

Indictment: dilkhayot kasimov was added to a superseding indictment in which three previously arrested men. Abdurasul hasanovich juraboev, akhror saidakhmetov, and abror habibov were charged with two counts of providing support to a foreign terrorist organization. those three have pleaded not guilty. It is unclear if kasimov has been arrested.

6. "we did everything that we could do," kenya's foreign minister says. Despite intelligence, rapid response team stuck in nairobi for hours after massacre, official says. Al-shabaab's mohamed mohamud "has a lot of grudges against the kenyans," expert says.

New: kenyan military sources not to give names to media. two of the airstrikes hit al-shabaab training camps. The operation has been ongoing, the military source says. it is customary for kenyan military sources.

Airstrikes hit al-shabaab stronghold of godon dhawe. military source says strikes were not retribution for last week's massacre. Military source says intelligence beforehand that a university in garissa could be attacked.

Al-shabaab says airstrikes target the terror group in somalia. Military source says strikes were not retribution for last week's massacre. Military source says intelligence beforehand that a university in garissa could be attacked.

U.n. source says al-shabaab stronghold of godon dhawe could be attacked. Military source says strikes were not retribution for last week's massacre. Military source says intelligence beforehand that a university in garissa could be attacked.

Kenya launched airstrikes targeting the terror group in somalia. The operation has been ongoing, the military source says. It is customary for kenyan military sources not to give their names to media.

Kenya launched airstrikes targeting the terror group in somalia. The operation has been ongoing, military source says. It is customary for kenyan military sources not to give their names to media.

Kenya launched airstrikes targeting the terror group in somalia. The operation has been ongoing, the military source says. It is customary for kenyan military sources. It's not clear exactly why the elite team was stuck in nairobi for hours.

Kenya launched airstrikes targeting the terror group in somalia. the operation has been ongoing, the military source says. It is customary for kenyan military sources. It's not clear exactly why the elite team was stuck in nairobi.

7. The total eclipse lasted 4 minutes and 43 seconds. People west of the mississippi river had the best view in the u.s. parts of south america, india, china and russia were able to see the eclipse.

Nasa says lunar eclipses typically happen at least twice a year. The moon slipped fully into earth's shadow at 4:58 a.m. pacific time. The event started at 3:16 a.m. pt -lrb- 6:16 a.m. et -rrb-.

Nasa says lunar eclipses typically happen at least twice a year. The moon slipped fully into earth's shadow at 4:58 a.m. pacific time. The moon began at 3:16 a.m. pt -lrb- 6:16 a.m. et -rrb-.

New: lunar eclipse is the third in a series of four in a row. The space agency predicts the next one will come september 28. The moon slipped fully into earth's shadow at 4:58 a.m. pacific time.

Nasa says lunar eclipses typically happen at least twice a year. The moon slipped fully into earth's shadow at 4:58 a.m. et saturday. The moon began at 3:16 a.m. pt -lrb- 6:16 a.m. et -rrb-.

The moon slipped fully into earth's shadow at 4:58 a.m. pacific time. The event started at 3:16 a.m. pt -lrb- 6:16 a.m. et -rrb-, when the moon set below the horizon.

The moon slipped fully into earth's shadow at 4:58 a.m. pacific time. Watchers in the eastern half of north america caught only a partial eclipse. Nasa says lunar eclipses typically happen at least twice a year.

The moon slipped fully into earth's shadow at 4:58 a.m. pacific time -lrb- 7:58 a.m. et -rrb- saturday. The celestial body took on a burnt-orange tint in the minutes before, during and after the total eclipse.

The moon slipped fully into earth's shadow at 4:58 a.m. pacific time. The celestial body took on a burnt-orange tint in the minutes before, during and after the total eclipse. Nasa says lunar eclipses typically happen at least twice a year.

8. This week, turkey was gripped by a massive power outage and a deadly hostage crisis. Reactions reveal contemporary turkey is tense and confused after years of political crises. Censorship has pushed critics to fringes in country cited as democratic model for mideast.

Dozens of cities across turkey lost power for hours on tuesday. Millions of people were affected, including passengers stranded on paralyzed trains. Turkish officials were still at pains to explain the power outage.

Millions of people were affected, including passengers stranded on paralyzed trains. Municipal workers were forced to evacuate istanbul's marmaray tunnel. More than 24 hours later, turkish officials were still at pains to explain the power outage.

Turks left confused and concerned by the worst power outage. The prime minister did not rule out the possibility of a terror attack. the mysterious collapse of much of the country's energy grid triggered a burst of wild conspiracy theories.

Turks left confused and concerned by the worst power outage. the prime minister did not rule out the possibility of a terror attack. The mysterious collapse of much of the country's energy grid triggered a hyper-polarized political atmosphere.

Turks left confused and concerned by the worst power outage to grip the country in more than a decade. Municipal workers were forced to evacuate istanbul's marmaray tunnel. More than 24 hours later, turkish officials were still at pains to explain the power outage.

Turks left confused and concerned by the worst power outage to grip the country in more than a decade. More than 24 hours later, turkish officials were still at pains to explain the power outage. The prime minister did not rule out the possibility of a terror attack.

Turks left confused and concerned by the worst power outage to grip the country in more than a decade. More than 24 hours later, including passengers stranded on paralyzed trains and subways. Municipal workers were forced to evacuate istanbul's marmaray tunnel.

Turks left confused and concerned by the worst power outage to grip the country in more than a decade. More than 24 hours later, turkish officials were still at pains to explain the power outage. The mysterious collapse of much of the country's energy grid triggered a burst of wild conspiracy theories.



9. Racially-charged and offensive emails from ferguson released after public records request. Two ferguson police officers resigned over racist emails. City's top court clerk was fired.

Two police officers were found during a u.s. justice department investigation. The emails make offensive references to president obama, first lady michelle obama. The emails are discovered as part of the evidence.

Police discovered during a u.s. justice department investigation. The emails make offensive references to president obama, first lady michelle obama. the emails were discovered as part of the evidence in the justice department's scathing ferguson report.

Two police officers were found during a u.s. justice department investigation. The emails make offensive references to president obama, first lady michelle obama. The emails were discovered as part of the evidence in ferguson's scathing ferguson report.

Racist and offensive emails resulted in three ferguson, missouri, city employees. Emails make offensive references to president obama, first lady michelle obama. Emails were discovered during u.s. justice department investigation.

The exchanges between the city's top court clerk and two police officers were discovered during a u.s. justice department investigation of racial prejudice. First lady michelle obama as well as muslims and minorities. The city's top court clerk, mary ann twitty, was fired in connection with the emails.

The exchanges between the city's top court clerk and two police officers were discovered during a u.s. justice department investigation of racial prejudice in the city's police and judicial system. First lady michelle obama as well as muslims and minorities. Some critics have called for the department to be disbanded.

The exchanges between the city's top court clerk and two police officers were discovered during a u.s. justice department investigation of racial prejudice in the city's police and judicial system. First lady michelle obama as well as muslims and minorities. The doj declined to bring charges against wilson, who has since left the force.

The exchanges between the city's top court clerk and two police officers were discovered during a u.s. justice department investigation of racial prejudice in the city's police and judicial system. The emails make offensive references to president obama, first lady michelle obama as well as muslims and minorities. The doj declined to bring charges against wilson.

10. Getty's death appears to be natural causes or accident, coroner's office says. Mother and father of andrew getty confirm death, asks for privacy.

The 47-year-old grandson of j. paul getty, died tuesday afternoon. Getty's death "appears to be natural -lrb- causes -rrb- or an accident," assistant chief says. Getty's attorney was not immediately successful.

Ed winter, the 47-year-old grandson of j. paul getty, died tuesday afternoon. Getty's death "appears to be natural -lrb- causes -rrb- or an accident," assistant chief says. Getty's attorney was not immediately successful.

Ann and gordon getty, the 47-year-old grandson of j. paul getty, died tuesday. Getty's death "appears to be natural -lrb- causes -rrb- or an accident," assistant chief says. Getty's attorney was not immediately successful.

Andrew getty, the 47-year-old of j. paul getty, died tuesday afternoon. Getty's death "appears to be natural -lrb- causes -rrb- or an accident," assistant chief says. Getty's attorney was not immediately successful.

Getty's death "appears to be natural -lrb- causes -rrb- or an accident," assistant chief says. Getty's death "appears to be natural -lrb- causes -rrb- or an accident," police say. Getty, 81, has a net worth of \$ 2.1 billion.

Getty's death "appears to be natural -lrb- causes -rrb- or an accident -rrb-," assistant chief says. Getty's death "appears to be natural -lrb- causes -rrb- or an accident," assistant chief says. Getty, 81, has a net worth of \$ 2.1 billion.

Getty's death "appears to be natural -lrb- causes -rrb- or an accident -rrb-," assistant chief says. Getty's death "appears to be natural -lrb- causes -rrb- or an accident," police say. Getty, 81, has a net worth of \$ 2.1 billion.

Getty's death "appears to be natural -lrb- causes -rrb- or an accident," assistant chief in los angeles. Getty's death "appears to be natural -lrb- causes -rrb- or an accident," assistant chief says. Getty, 81, has a net worth of \$ 2.1 billion.

11. Ndreas lubitz, the co-pilot who crashed the germanwings flight, battled with depression. Jay ruderman and jo ann simons: society must talk about mental illness to help people cope with it better.

The latest report shows that he sped up the descent of the plane to its doom. The investigation unfolds, we will learn more about to what extent lubitz kept his mental illness secret.

This is the latest report shows that he sped up the descent of the plane to its doom. The investigation unfolds, we will learn more about to what extent lubitz kept his mental illness secret.

John sutter: we will learn more about to what extent lubitz kept his mental illness secret. He says the investigation is a broad category encompassing many different challenges that affect people in a variety of ways.

Andreas lubitz was the plane to its doom when she drove up the descent of the plane. The investigation unfolds, we will learn more about to what extent lubitz kept his mental illness secret.

Co-pilot andreas lubitz to crash germanwings flight 9525 into the french alps. The latest report shows that he sped up the descent of the plane to its doom. As the investigation unfolds, we will learn more about to what extent lubitz kept his mental illness secret.

Co-pilot andreas lubitz to crash germanwings flight 9525 into the french alps. The latest report shows that he sped up the descent of the plane to its doom. His case raises larger and important issues about people who are burdened with mental illness.

Co-pilot andreas lubitz to crash germanwings flight 9525 into the french alps. The latest report shows that he sped up the descent of the plane to its doom. As the investigation unfolds, we will learn more about what extent lubitz kept his mental illness secret.

Co-pilot andreas lubitz to crash germanwings flight 9525 into the french alps. The latest report shows that he sped up the descent of the plane to its doom. As the investigation unfolds, we will learn more about to what extent lubitz kept his mental illness.

12. Prince Harry pays his respects at the tomb of the unknown Australian soldier. He is starting a four-week attachment with the Australian military.

Britain's Prince Harry visits Australian war memorial in Canberra. He has already spent time with Australian troops on a number of occasions. He began his formal military duties in 2005 at the Royal Military Academy Sandhurst.

30-year-old Prince visited Australian war memorial in Canberra. Before reporting for duty, the 30-year-old visited the Australian war memorial. He has already spent time with Australian troops on a number of occasions during military career.

UK's Prince Harry visits Australian war memorial in Canberra. He has already spent time with Australian troops on a number of occasions. He began his formal military duties in 2005 at the Royal Military Academy Sandhurst.

Prince Harry's son visited the Australian war memorial in Canberra. He has already spent time with Australian troops on a number of occasions. He began his formal military duties in 2005 at the Royal Military Academy Sandhurst.

The 30-year-old Prince visited the Australian war memorial in Canberra. He has already spent time with Australian troops on a number of occasions. Australian military officials say the Prince's program with them will be "challenging".

The 30-year-old Prince visited the Australian war memorial in Canberra. He has already spent time with Australian troops on a number of occasions during his 10-year military career. Australian military officials say the Prince's program with them will be "challenging".

The 30-year-old Prince visited the Australian war memorial in Canberra. He has already spent time with Australian troops on a number of occasions. He began his formal military duties in 2005 at the Royal Military Academy Sandhurst.

The 30-year-old Prince visited the Australian war memorial in Canberra. He has already spent time with Australian troops on a number of occasions during military career. Australian military officials say the Prince's program with them will be "challenging".

13. The sheriff says a “big mistake” contributed to the inmate’s escape. 2 months after being convicted of murder, kamron taylor escaped an illinois jail. He is captured by police 60 miles away in chicago, authorities say.

The 23-year-old convicted murderer turned jail escapee until his arrest. Authorities around illinois had been looking for taylor since early wednesday. The suspect ran five city blocks before being tracked down, carrying a loaded handgun.

Surveillance video was the last officials saw of taylor until just before midnight friday. Surveillance video was the last officials saw a guy that matched the description. Fingerprints later confirmed that chicago police had indeed caught up with taylor.

Illinois sheriff tim bukowski says kamron taylor’s name tattooed on his neck. Surveillance video was last officials saw taylor until midnight friday. Suspect ran five city blocks before being tracked down, carrying a loaded handgun.

Gertrude taylor was convicted in chicago, when he jumped a correctional officer. The suspect ran five city blocks before being tracked down. Fingerprints later confirmed that chicago police had indeed caught up with taylor.

The 23-year-old convicted murderer turned jail escapee until his arrest overnight in chicago. The suspect ran five city blocks before being tracked down, carrying a loaded handgun. Fingerprints later confirmed that chicago police had indeed caught up with taylor.

The 23-year-old convicted murderer turned jail escapee until his arrest overnight in chicago. The suspect ran five city blocks before being tracked down, carrying a loaded handgun. Fingerprints later confirmed that chicago police caught up with taylor.

The 23-year-old convicted murderer turned jail escapee until his arrest overnight in chicago. The suspect ran five city blocks before being tracked down, carrying a loaded handgun. He didn't go easily, refusing to identify himself.

The 23-year-old convicted murderer turned jail escapee until his arrest overnight in chicago. The suspect ran five city blocks before being tracked down, carrying a loaded handgun. It wasn't immediately known when taylor will return to kankakee county.

14. Australian police have arrested two people after the discovery of 55 greyhound carcasses in bushland. They believe the dogs were dumped by people involved in the lucrative greyhound racing industry. The industry has been under fire since a television investigation revealed live baiting and other abuses.

At least 55 dog carcasses were found dumped in queensland bush. The woman, a licensed trainer, was also charged with obstructing police. The animal rights group is assisting queensland police in their investigation.

Two people arrested in australia after at least 55 dog carcasses were found dumped in queensland bush. The woman, a licensed trainer, was also charged with obstructing police. The animal rights organization is assisting queensland police in their investigation.

Two people arrested in australia after at least 55 dog carcasses were found dumped in queensland bush. The woman, a licensed trainer, was also charged with obstructing police. The animal rights organization is assisting queensland police.

Trainer, a licensed greyhound trainer, was arrested in australia. The woman, a licensed trainer, was also charged with obstructing police. The animal rights group is assisting queensland police.

At least 55 dog carcasses were found dumped in queensland bush. The woman, a licensed trainer, was also charged with obstructing police. The animal rights organization is assisting queensland police.

At least 55 dog carcasses were found dumped in queensland bush. The woman, a licensed trainer, was also charged with obstructing police. The animal rights group is assisting queensland police.

At least 55 dog carcasses were found dumped in queensland bush. The woman, a licensed trainer, was also charged with obstructing police. The animal rights group is assisting queensland police in their investigation.

At least 55 dog carcasses were found dumped in queensland bush. The woman, a licensed trainer, was also charged with obstructing police. The animal rights organization is assisting queensland police in their investigation.

15. Ayatollah khomeini said he was “drinking poison” when he accepted a ceasefire. He dragged out the war for eight years. By the time he ended the war, the economy was in shambles.

Ayatollah khomeini says he was “drinking poison” when he accepted a ceasefire. He dragged out the war for eight years, despite saddam’s willingness to accept a ceasefire. He says iran can develop its gas and oil fields.

Ayatollah khomeini says he was “drinking poison” when he accepted a ceasefire. He dragged out the war for eight years, despite saddam’s willingness to accept a ceasefire. He says iran can develop its gas and oil fields to celebrate the agreement.

David frum: ayatollah khomeini’s successor would raise the chalice and surrender to demands by the west to end iran’s nuclear program. He says iran can develop its gas and oil fields, and the economy can leap forward.

Iran’s nuclear program is peaceful, but khamenei’s refusal to end uranium enrichment activities. Iran’s regime has not been seen in the past week, but the opposition says. Iran’s nuclear program is the world’s largest nuclear program.

Ayatollah khomeini said he was “drinking poison” when he accepted a ceasefire. He dragged out the war for eight years. By the time he ended the war, the economy was in shambles.

Ayatollah khomeini said he was “drinking poison” when he accepted a ceasefire to end the eight-year-old war. The war had helped define khomeini’s regime, the islamic republic, which he had founded a year before saddam hussein invaded iran.

Ayatollah khomeini said he was “drinking poison” when he accepted a ceasefire to end the eight-year-old war with iraq. The war had helped define khomeini’s regime, the islamic republic, which he had founded a year before saddam hussein invaded iran.

Ayatollah khomeini said he was “drinking poison” when he accepted a ceasefire to end the eight-year-old war with iraq. He dragged out the war for eight years, despite saddam’s willingness to accept a ceasefire.
